# Supplementary material
Source: MDPI journal article supplement (https://www.mdpi.com/2311-553X/8/1/18)
Supplement: s1 [file s1]

---

## Supplementary Materials

**Table S1.** An overview of the histone modification and expression data used in HiMoRNA.

| Histone Modification | Samples | Expressed lncRNAs |
|----------------------|---------|-------------------|
| H3K27ac              | 49      | 5974              |
| H3K27me3             | 50      | 6110              |
| H3K36me3             | 52      | 6071              |
| H3K4me1              | 51      | 6156              |
| H3K4me2              | 19      | 3027              |
| H3K4me3              | 59      | 6434              |
| H3K9ac               | 19      | 3268              |
| H3K9me3              | 50      | 3200              |
| H3K79me2             | 20      | 5983              |
| H4K20me1             | 19      | 3027              |

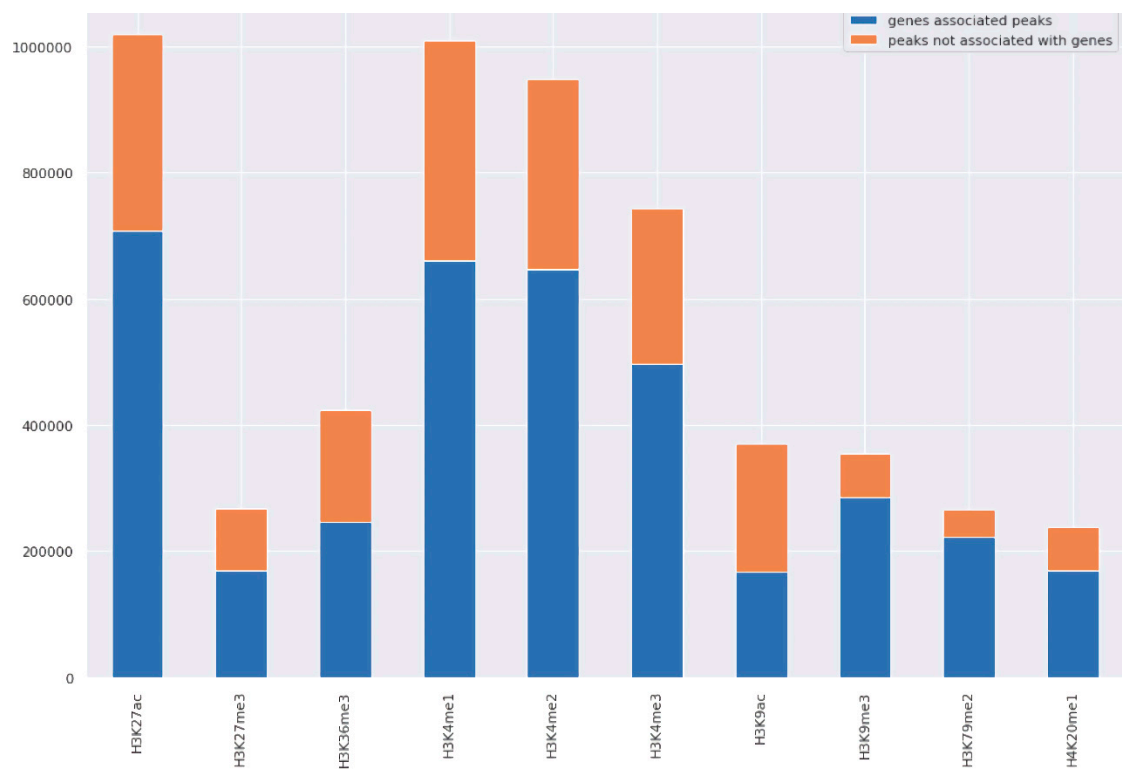

**Supplementary Figure S1.** Genes to histone modification peaks association.
